# Supplementary material for: Influence of CYP2C8*3 and ABCG2 C421A genetic polymorphisms on trough concentration and molecular response of imatinib in Egyptian patients with chronic myeloid leukemia
Source: PubMed Central journal article supplement (PMC11666798; doi:10.1007/s00280-024-04723-y), 2024-12-23
Supplement: 280_2024_4723_MOESM1_ESM.pdf [file 280_2024_4723_MOESM1_ESM.pdf]

**Influence of *CYP2C8\*3* and *ABCG2 C421A* genetic polymorphisms on trough concentration and molecular response of imatinib in Egyptian patients with chronic myeloid leukemia**

**Safwat A. Mangoura<sup>1,2</sup>, Mahmoud H. Abdel-Raheem<sup>2</sup>, Hanan A. Eltyb<sup>3</sup>, Mohammed S. Molla<sup>2</sup>, Abeer M. R. Hussein<sup>2</sup>**

<sup>1</sup> Department of Pharmacology and Toxicology, Faculty of Pharmacy, Badr University in Cairo (BUC), Badr, Cairo, Egypt

<sup>2</sup> Department of Medical Pharmacology, Faculty of Medicine, Assiut University, Assiut, Egypt

<sup>3</sup> Department of Medical Oncology and Malignant Hematology, South Egypt Cancer Institute (SECI), Assiut University, Assiut, Egypt

**Corresponding author:** Mohammed S. Molla

Department of Medical Pharmacology, Faculty of Medicine, Assiut University, Assiut 71515, Egypt

E-mail: [mohamedsayed@aun.edu.eg](mailto:mohamedsayed@aun.edu.eg)

Orchid ID: <https://orcid.org/0000-0002-5990-6152>

**Details of the polymerase chain reaction-restriction fragment length polymorphism (PCR-RFLP) of *CYP2C8\*3* and *ABCG2 C421A* polymorphisms:**

- a- **Polymerase chain reaction amplification of DNA samples:** A 50  $\mu\text{L}$  reaction mixture was prepared in a 0.2 mL PCR tube following the manufacturer's protocol. The mixture included 25  $\mu\text{L}$  of COSMO PCR Master Mix, 2  $\mu\text{L}$  each of forward and reverse primers, 11  $\mu\text{L}$  of nuclease-free water, and 10  $\mu\text{L}$  of the DNA template.
- b- **Restriction fragment length polymorphism analysis:** The amplified PCR products for each gene were digested with the appropriate restriction enzymes according to the manufacturer's protocol. For each sample, a 30  $\mu\text{L}$  restriction reaction mixture was prepared, containing 17  $\mu\text{L}$  of nuclease-free water, 2  $\mu\text{L}$  of buffer, 10  $\mu\text{L}$  of PCR product, and 1  $\mu\text{L}$  of the restriction enzyme.

The primer sequences, PCR thermal conditions, restriction enzymes, and incubation temperatures for each SNP are presented in the following table:

|                                               | <b><i>CYP2C8*3 (G416A; rs11572080)</i></b> | <b><i>ABCG2 C421A (rs2231142)</i></b>  |
|-----------------------------------------------|--------------------------------------------|----------------------------------------|
| <b>Primer sequence:</b>                       |                                            |                                        |
| - Forward                                     | 5' AGGCAATTCCCCAATATCTC-3'                 | 5'-<br>TGTTGTGATGGGCACTCTGATGT<br>G-3' |
| - Reverse                                     | 5'-ACTCCTCCACAAGGCAGTGA-3'                 | 5'-<br>ATCAGAGTCATTTTATCCACAC -<br>3'  |
| <b>PCR thermal conditions:</b>                |                                            |                                        |
| - Initial denaturation                        | 94 °C for 2 minutes.                       | 94 °C for 10 minutes.                  |
| - Denaturation                                | 94 °C for 30 seconds                       |                                        |
| - Annealing                                   | 48 °C for 80 seconds.                      | 53 °C for 30 seconds                   |
| - Extension                                   | 72 °C for 1 minute.                        | 53 °C for 30 seconds                   |
| - Number of cycles                            | 35 cycles                                  |                                        |
| - Final extension                             | 72 °C for 7 minutes.                       |                                        |
| <b>PCR product [base pair (bp)]</b>           | 347                                        | 222                                    |
| <b>Restriction enzyme</b>                     | <i>Bse</i> RI                              | <i>Hpy</i> CH4III                      |
| <b>Digestion temperature and duration</b>     | 37 °C for 15 minutes                       | 37°C for 1 hours                       |
| <b>Fragments length after digestion (bp):</b> |                                            |                                        |
| - Homozygous wild type                        | <b>GG:</b> 310.                            | <b>CC:</b> 183.                        |
| - Heterozygous type                           | <b>GA:</b> 347 and 310.                    | <b>CA:</b> 222 and 183                 |

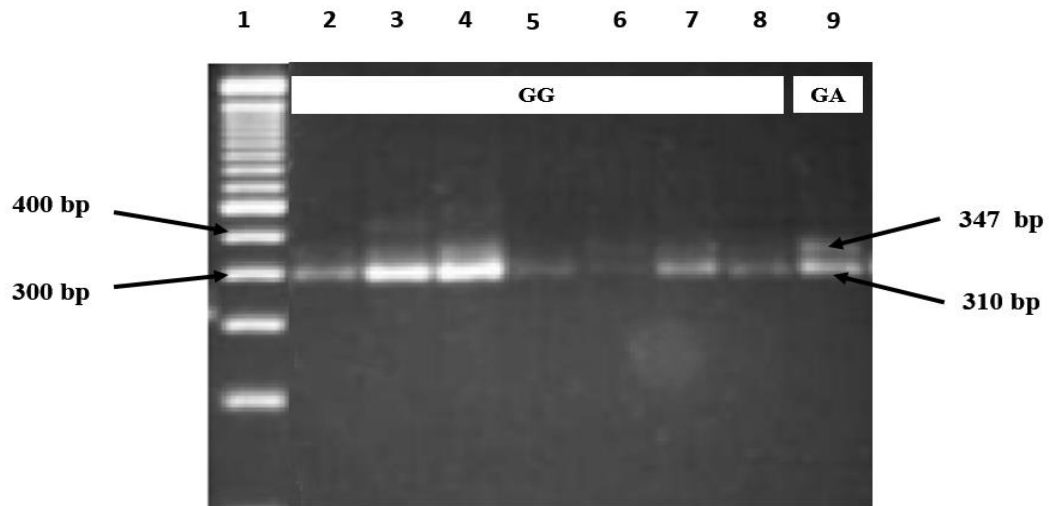

**Gel electrophoresis of *CYP2C8\*3* (G416A; rs11572080) polymorphism following PCR-RFLP analysis.**

Lane 1 contains a 100 bp DNA ladder. Lanes 2–8 display the 310 bp band, indicating the wild-type homozygous genotype (GG; *CYP2C8\*1/\*1*). Lane 9 shows the 347 bp and 310 bp bands, representing the heterozygous genotype (GA; *CYP2C8\*1/\*3*).

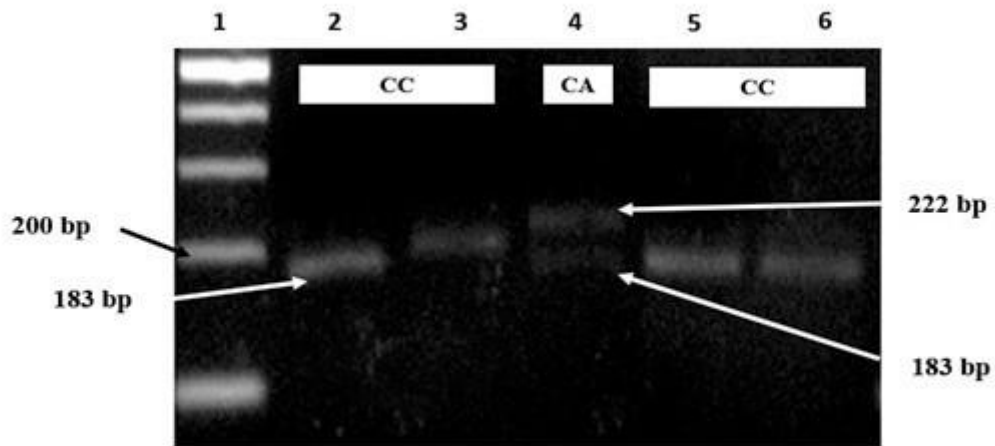

**Gel electrophoresis of *ABCG2* C421A (rs2231142) polymorphism following PCR-RFLP analysis.**

Lane 1 contains a 100 bp DNA ladder. Lanes 2, 3, 5, and 6 display the 183 bp band, indicating the wild-type homozygous genotype (CC). Lane 4 shows both the 222 bp and 183 bp bands, representing the heterozygous genotype (CA).
